# Supplementary material
Source: PubMed Central journal article supplement (PMC5938732)

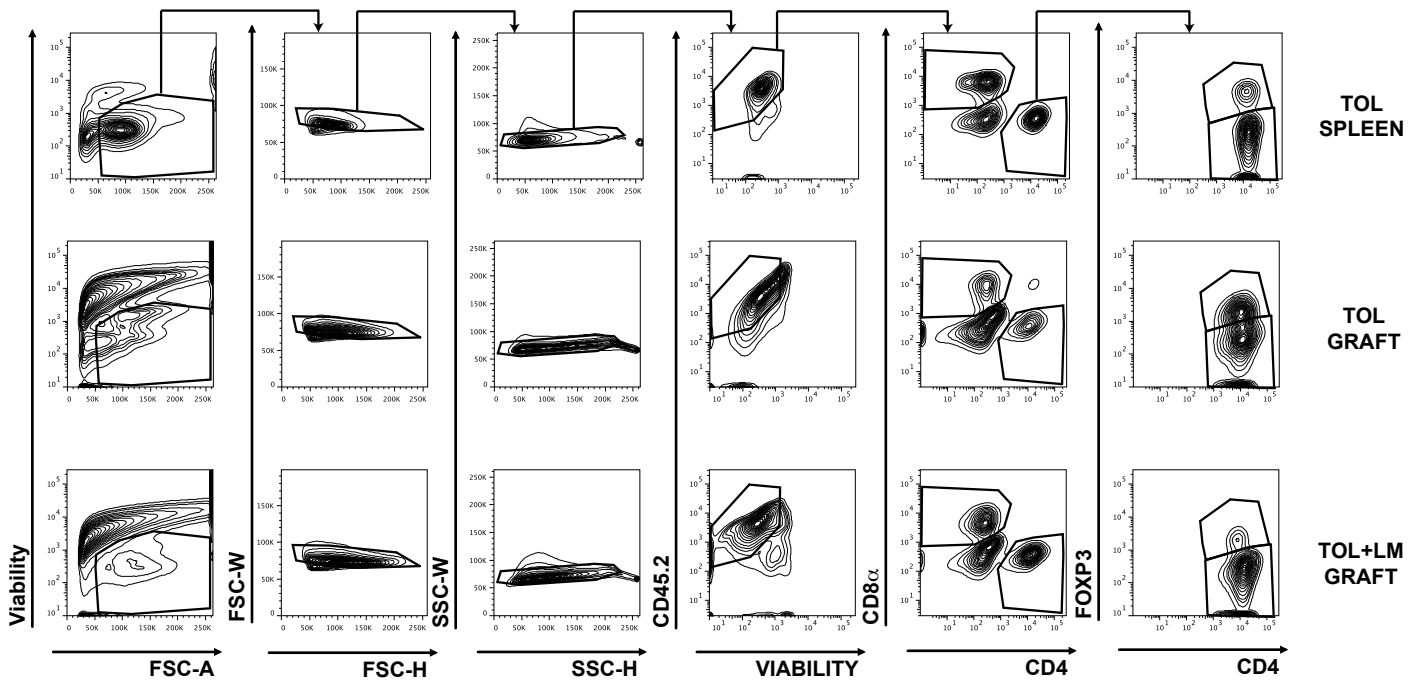

Young et al. Supplementary Figure 1

Supplement: NIHMS948534-supplement-FigS1.pdf [file NIHMS948534-supplement-FigS1.pdf]

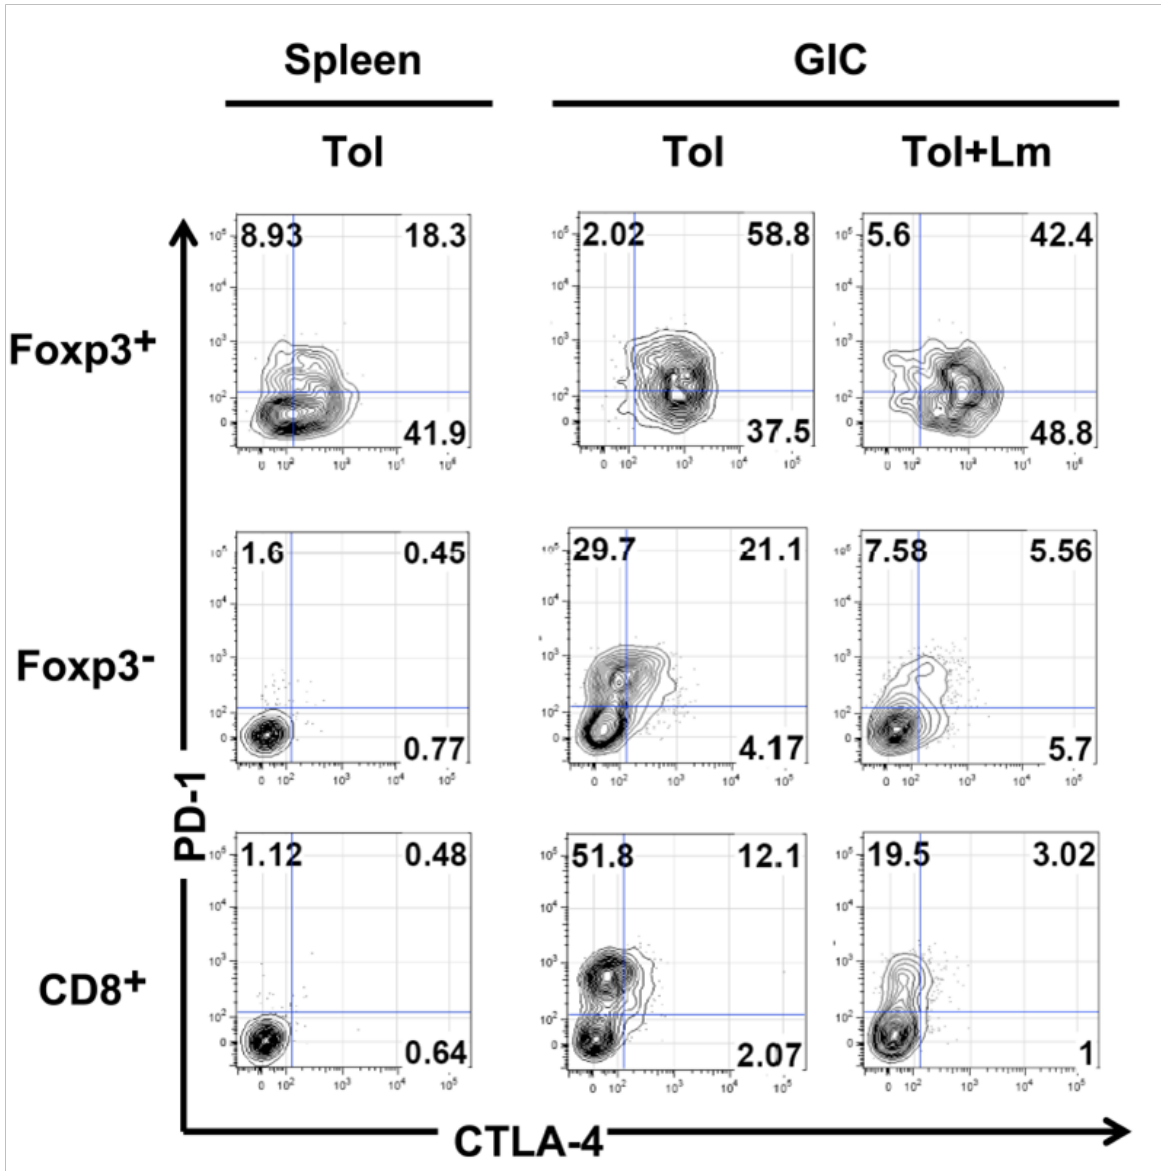

Young et al. Supplementary Figure 2

Supplement: NIHMS948534-supplement-FigS2.pdf [file NIHMS948534-supplement-FigS2.pdf]
